# Supplementary material
Source: PubMed Central journal article supplement (PMC7965474)
Supplement: 2044_figstables.pdf [file 2044_figstables.pdf]

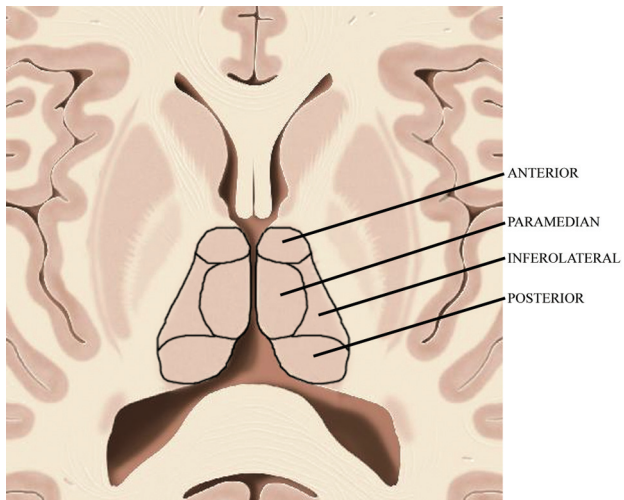

**On-line Fig 1.** Four main vascular territories of the thalamus: anterior (the polar or thalamotuberal artery from the PcomA), paramedian (the paramedian or thalamoperforate artery from P1), inferolateral (the thalamogeniculate artery from P2), and posterior (posterior choroidal arteries from P2).

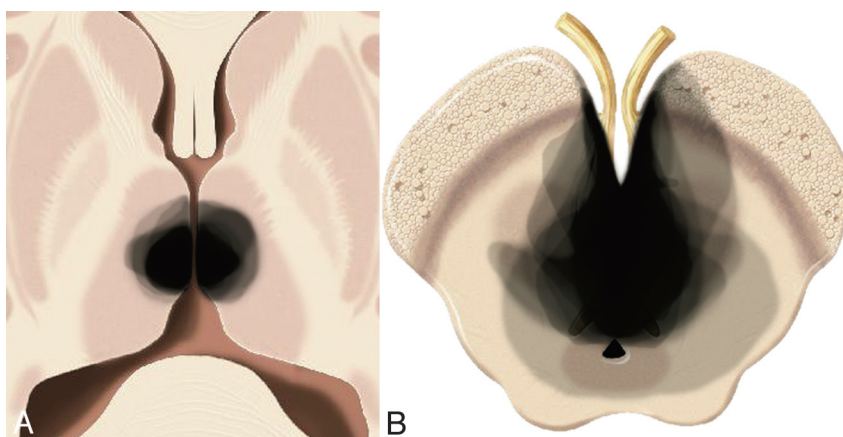

**On-line Fig 2.** Pattern 1 (43%). Bilateral paramedian thalamic (A) with midbrain (B) infarction. Sixteen of 37 cases are superimposed with increased opacity representing more commonly affected regions.

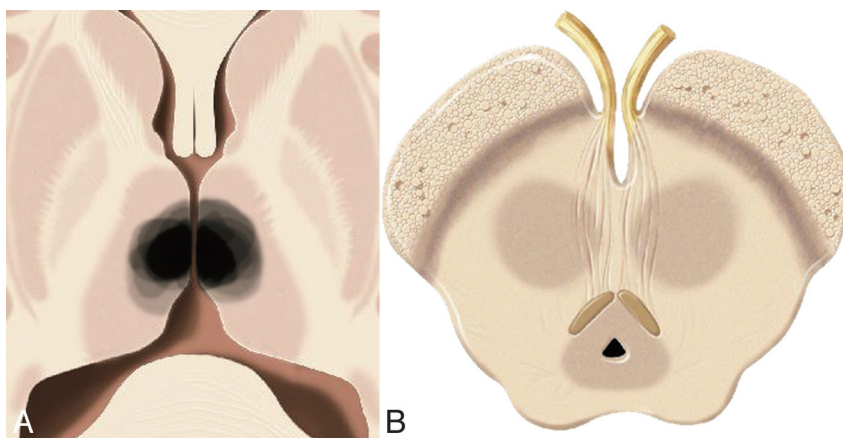

**On-line Fig 3.** Pattern 2 (38%). Bilateral paramedian thalamic (A) without midbrain (B) infarction. Fourteen of 37 cases are superimposed, with increased opacity representing more commonly affected regions.

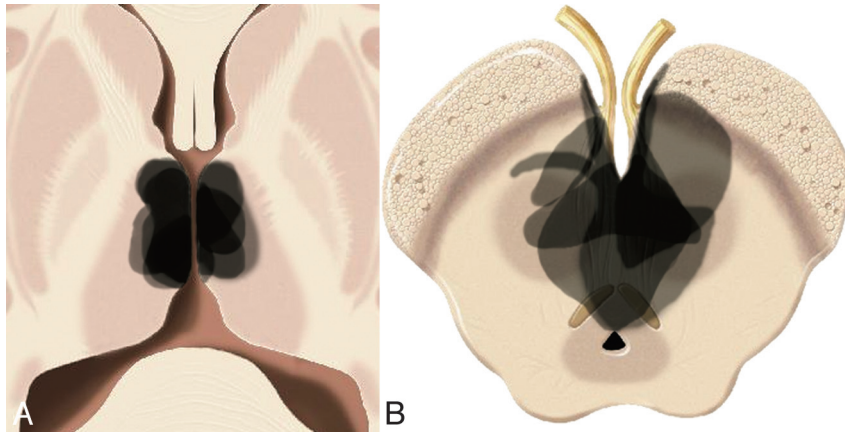

**On-line Fig 4.** Pattern 3 (14%). Bilateral paramedian thalamic with anterior thalamus (A) and midbrain (B) infarction. Five of 37 cases are superimposed, with increased opacity representing more commonly affected regions.

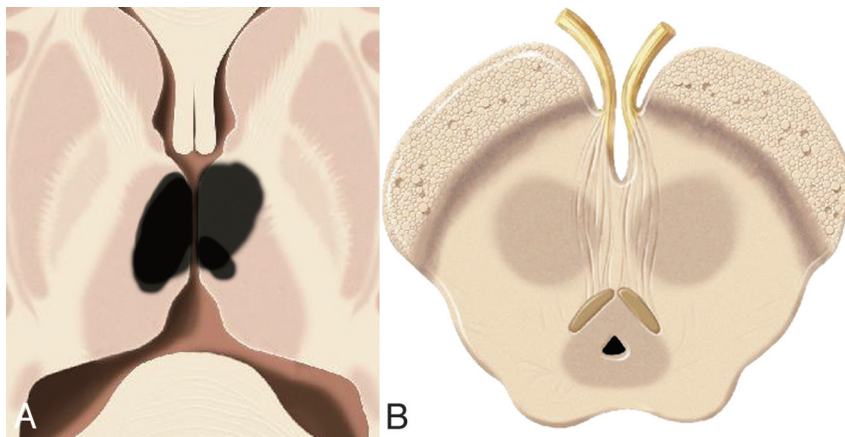

**On-line Fig 5.** Pattern 4 (5%). Bilateral paramedian thalamic with anterior thalamus (A) without midbrain (B) ischemia. Two of 37 cases are superimposed, with increased opacity representing more commonly affected regions.

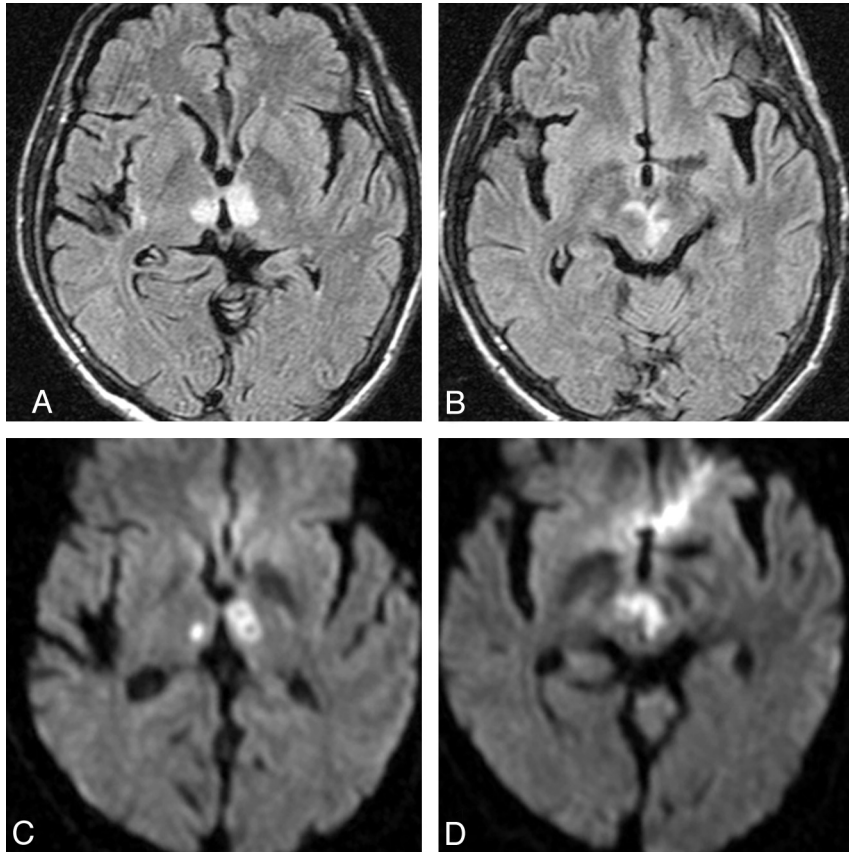

**On-line Fig 6.** Case 35. Axial FLAIR (A and B) and DWI (C and D) images at the level of the thalamus (A and C) and midbrain (B and D) demonstrate bilateral paramedian thalamic with anterior left thalamic and midbrain infarction (pattern 3). Notice the hyperintense signal intensity along the pial surface of the midbrain interpeduncular fossa representing the V sign (B).

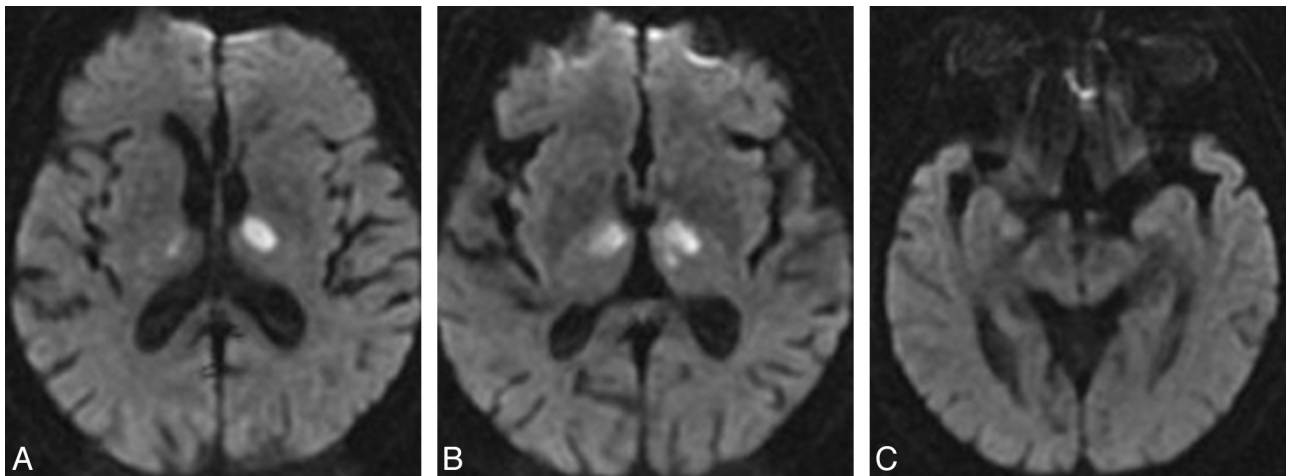

**On-line Fig 7.** Case 36. Axial DWI images demonstrate bilateral paramedian and anterior thalamic ischemia without midbrain involvement (pattern 4).

**On-line Table 1: Summary of all cases**

| No. | Age (yr)/<br>Sex | Pattern | Paramedian Thalamus | Anterior Thalamus | Midbrain | V Sign | Additional Infarcts            | Imaging          |
|-----|------------------|---------|---------------------|-------------------|----------|--------|--------------------------------|------------------|
| 1   | 82/F             | 1       | Asymmetric, L>R     |                   | Y        | Y      | Temporal                       | MR               |
| 2   | 52/F             | 1       | Asymmetric, R>L     |                   | Y        | Y      | Cerebellar                     | MR, CTA, CT      |
| 3   | 44/F             | 1       | Asymmetric, R>L     |                   | Y        | Y      | Cerebellar                     | MR, CT           |
| 4   | 45/M             | 1       | Symmetric           |                   | Y        | Y      | Cerebellar, frontal            | MR, CT           |
| 5   | 70/F             | 1       | Asymmetric, L>R     |                   | Y        | Y      |                                | MR, CT           |
| 6   | 39/M             | 1       | Symmetric           |                   | Y        |        |                                | MR               |
| 7   | 72/M             | 1       | Asymmetric, R>L     |                   | Y        | Y      |                                | MR               |
| 8   | 63/M             | 1       | Asymmetric, R>L     |                   | Y        |        |                                | MR, MRA, CTA     |
| 9   | Unknown          | 1       | Asymmetric, L>R     |                   | Y        | Y      |                                | MR               |
| 10  | Unknown          | 1       | Symmetric           |                   | Y        | Y      |                                | MR               |
| 11  | 93/F             | 1       | Asymmetric, R>L     |                   | Y        | Y      |                                | MR, MRA, CT      |
| 12  | 71/F             | 1       | Asymmetric, L>R     |                   | Y        | Y      |                                | MR, MRA, CTA, CT |
| 13  | 44/F             | 1       | Asymmetric, L>R     |                   | Y        |        |                                | MR, MRA, CTA     |
| 14  | 63/?             | 1       | Asymmetric, R>L     |                   | Y        |        |                                | MR, CT           |
| 15  | 65/M             | 1       | Asymmetric, L>R     |                   | Y        | Y      |                                | MR, MRA          |
| 16  | 48/?             | 1       | Symmetric           |                   | Y        | Y      |                                | MR               |
| 17  | 49/M             | 2       | Asymmetric, L>R     |                   |          |        |                                | MR, MRA          |
| 18  | 62/M             | 2       | Symmetric           |                   |          |        |                                | MR, CT, angio    |
| 19  | 28/M             | 2       | Asymmetric, L>R     |                   |          |        |                                | MR, CT           |
| 20  | 72/F             | 2       | Symmetric           |                   |          |        |                                | MR, CT, CT perf  |
| 21  | 62/M             | 2       | Symmetric           |                   |          |        |                                | MR               |
| 22  | 66/M             | 2       | Asymmetric, L>R     |                   |          |        | Occipital                      | MR, MRA          |
| 23  | 31/F             | 2       | Asymmetric, L>R     |                   |          |        |                                | MR, CTA, angio   |
| 24  | 47/F             | 2       | Asymmetric, R>L     |                   |          |        |                                | CT               |
| 25  | 88/F             | 2       | Asymmetric, R>L     |                   |          |        |                                | MR               |
| 26  | 77/F             | 2       | Symmetric           |                   |          |        | Cerebellar, occipital, frontal | MR               |
| 27  | 61/F             | 2       | Asymmetric, R>L     |                   |          |        |                                | MR               |
| 28  | Unknown          | 2       | Symmetric           |                   |          |        |                                | CT               |
| 29  | Unknown          | 2       | Symmetric           |                   |          |        |                                | CT               |
| 30  | Unknown          | 2       | Symmetric           |                   |          |        |                                | CT               |
| 31  | 65/F             | 3       | Asymmetric, R>L     | Right             | Y        | Y      | Occipital, basal ganglia       | MR, CT           |
| 32  | 50/M             | 3       | Asymmetric, R>L     | Bilateral         | Y        |        | Cerebellar                     | MR, CT           |
| 33  | 34/M             | 3       | Symmetric           | Bilateral         | Y        |        | Cerebellar                     | MR, CTA, CT      |
| 34  | 41/M             | 3       | Asymmetric, L>R     | Left              | Y        |        | Cerebellar                     | CT               |
| 35  | 59/M             | 3       | Asymmetric, L>R     | Left              | Y        | Y      |                                | MR, CTA          |
| 36  | 77/M             | 4       | Asymmetric, L>R     | Bilateral         |          |        |                                | MR, MRA, CTA, CT |
| 37  | 82/F             | 4       | Asymmetric, R>L     | Right             |          |        | Occipital, frontal             | MR, CT           |

**On-line Table 2: Clinical data**

| No. | Age (yr)/ |         | Risk Factors                            | Etiology | Mental Status  | Ocular Deficit                              | Other Notable Findings                       | Outcome at Discharge   |
|-----|-----------|---------|-----------------------------------------|----------|----------------|---------------------------------------------|----------------------------------------------|------------------------|
|     | Sex       | Pattern |                                         |          |                |                                             |                                              |                        |
| 1   | 82/F      | 1       | HTN, HHC, CardAbn, ValvAbn              | CE       | Comatose       | Anisocoria                                  | Bilateral plantar extension                  | Death                  |
| 2   | 52/F      | 1       | H/o cocaine                             | LAA      | Stuporous      | INO                                         | L VA dissection                              | Partial recovery       |
| 3   | 44/F      | 1       | CVA-P, PFO, ValvAbn, CardAbn, tamoxifen | CE       | Obtunded       | R III palsy, vertical gaze palsy            | R Babinski                                   | Partial recovery       |
| 4   | 45/M      | 1       | HTN, HL, CAD, CVA-P, AF                 | CE       | Comatose       | R III palsy                                 | LV assist device                             | Death                  |
| 5   | 70/F      | 1       | AF, TIA-P, HTN                          | CE       | Waxing, waning | L III palsy, vertical gaze palsy            | Aphasia                                      | Partial recovery       |
| 7   | 72/M      | 1       | HTN, Tob                                | UND      | Comatose       | Bilateral mydriasis                         | L Babinski                                   | Death                  |
| 11  | 93/F      | 1       | PFO                                     | CE       | Confused       | Vertical gaze palsy, anisocoria             |                                              | ?                      |
| 12  | 71/F      | 1       | HTN, TIA-P, FMD                         | LAA      | ?              | L III palsy, vertical gaze palsy            | R weakness, ataxia, fetal L PCA, FMD         | ?                      |
| 13  | 44/F      | 1       | CVA-P, amphetamines                     | UND      | ?              | R III palsy                                 | Basilar tip aneurysm treated with coils      | ?                      |
| 17  | 49/M      | 2       | TIA-P, CAD, DM                          | SVO      | Confused       | R miosis/ptosis, R homonymous hemianopsia   | L weakness, ataxia                           | Unchanged              |
| 18  | 62/M      | 2       | Tob, HL, CAD                            | ODC      | Obtunded       | Bilateral miosis                            | S/p cardiac catheterization                  | Complete recovery      |
| 19  | 28/M      | 2       | PFO, DVT, HL                            | UND      | Confused       | Diplopia                                    | Ataxia, slurred speech                       | Complete recovery      |
| 20  | 72/F      | 2       | Tob, EtOH, AF                           | CE       | Alert          | R gaze preference, L homonymous hemianopsia | Dysarthria, L weakness                       | Complete recovery      |
| 21  | 62/M      | 2       | HTN, DM, HL, CAD, Tob                   | SVO      | Confused       | None                                        | Memory impairment                            | Unchanged              |
| 22  | 66/M      | 2       | HTN, CHF, HL                            | LAA      | Waxing, waning | None                                        | Aphasia, R weakness, thrombus in aortic arch | Significant impairment |
| 23  | 31/F      | 2       | OCP, HL                                 | ODC      | Confused       | None                                        | Dysarthria, R facial weakness                | Complete recovery      |
| 24  | 47/F      | 2       | EtOH                                    | UND      | Confused       | None                                        | Chronic paranoid schizophrenia               | Complete recovery      |
| 31  | 65/F      | 3       | HTN, HL, CAD, CVA-P                     | UND      | Obtunded       | Bilateral ptosis, INO                       | Severe ataxia, dysphagia                     | Partial recovery       |
| 32  | 50/M      | 3       | None                                    | UND      | Obtunded       | None                                        | Aphasia, ataxia, thalamic movement disorder  | Partial recovery       |
| 33  | 34/M      | 3       | HTN, HL                                 | LAA      | Obtunded       | Fixed upward gaze                           | L VA dissection                              | Partial recovery       |
| 34  | 41/M      | 3       | DM                                      | LAA      | Alert          | Vertical gaze palsy, INO                    | Dysarthria, R weakness, L VA dissection      | Partial recovery       |
| 35  | 59/M      | 3       | ?                                       | ODC      | Comatose       | Diplopia, R mydriasis                       |                                              | Partial recovery       |
| 36  | 77/M      | 4       | HTN, HL, CAD                            | LAA      | Obtunded       | ?                                           | Dysphagia, L VA stenosis                     | ?                      |

Note:—? Indicates unknown.

**On-line Table 3: Additional infarcts**

| No. | Age (yr)/Sex | Pattern | Timing | Regions                                                      | Territories           |
|-----|--------------|---------|--------|--------------------------------------------------------------|-----------------------|
| 1   | 82/F         | 1       | Acute  | Left temporal                                                | MCA                   |
| 2   | 52/F         | 1       | Remote | Lacunar left cerebellar                                      | SCA                   |
| 3   | 44/F         | 1       | Acute  | Lacunar right cerebellar                                     | PICA                  |
| 4   | 45/M         | 1       | Acute  | Left cerebellar and bilateral frontal                        | PICA, MCA             |
| 22  | 66/M         | 2       | Remote | Right occipital                                              | PCA                   |
| 26  | 77/F         | 2       | Acute  | Bilateral cerebellar, bilateral occipital, and right frontal | PCA, PICA, MCA        |
| 31  | 65/F         | 3       | Remote | Left occipital and left basal ganglia                        | PCA, MCA              |
| 32  | 50/M         | 3       | Acute  | Left cerebellar                                              | PICA                  |
| 33  | 34/M         | 3       | Acute  | Left cerebellar                                              | PICA                  |
| 34  | 41/M         | 3       | Acute  | Bilateral cerebellar                                         | Left PICA, right AICA |
| 37  | 82/F         | 4       | Acute  | Bilateral occipital and bilateral frontal                    | PCA, MCA              |
